# Supplementary material for: Acute Ammonia Causes Pathogenic Dysbiosis of Shrimp Gut Biofilms
Source: MDPI journal article supplement (doi:10.3390/ijms25052614), 2024-02-23
Supplement: s1 [file s1]

# Acute Ammonia Causes Pathogenic Dysbiosis of Shrimp Gut Biofilms

Ning Gao <sup>1,2,3</sup>, Yi Shu <sup>1,2,3</sup>, Yongming Wang <sup>1,2,3</sup>, Meng Sun <sup>4</sup>, Zhongcheng Wei <sup>3</sup>, Chenxi Song <sup>3</sup>, Weipeng Zhang <sup>4</sup>, Yue Sun <sup>2,3</sup>, Xiaoli Hu <sup>3</sup>, Zhenmin Bao <sup>1,2,3,\*</sup> and Wei Ding <sup>3,\*</sup>

<sup>1</sup> Southern Marine Science and Engineer Guangdong Laboratory, Guangzhou 511458, China; ninggao1005@163.com (N.G.); 15254135903@163.com (Y.S.); wmysyp12@163.com (Y.W.)

<sup>2</sup> Key Laboratory of Tropical Aquatic Germplasm of Hainan Province, Sanya Oceanographic Institution, Ocean University of China, Sanya 572000, China; sunyue@ouc.edu.cn

<sup>3</sup> MOE Key Laboratory of Marine Genetics and Breeding, Ocean University of China, Qingdao 266003, China; weizhongcheng@stu.ouc.edu.cn (Z.W.); 13397712090@163.com (C.S.)

<sup>4</sup> Institute of Evolution & Marine Biodiversity, Ocean University of China, Qingdao 266003, China; sunmeng950103@163.com (M.S.); zhangweipeng@ouc.edu.cn (W.Z.)

\* Correspondence: zmbao@ouc.edu.cn (Z.B.); dingwei@ouc.edu.cn (W.D.)

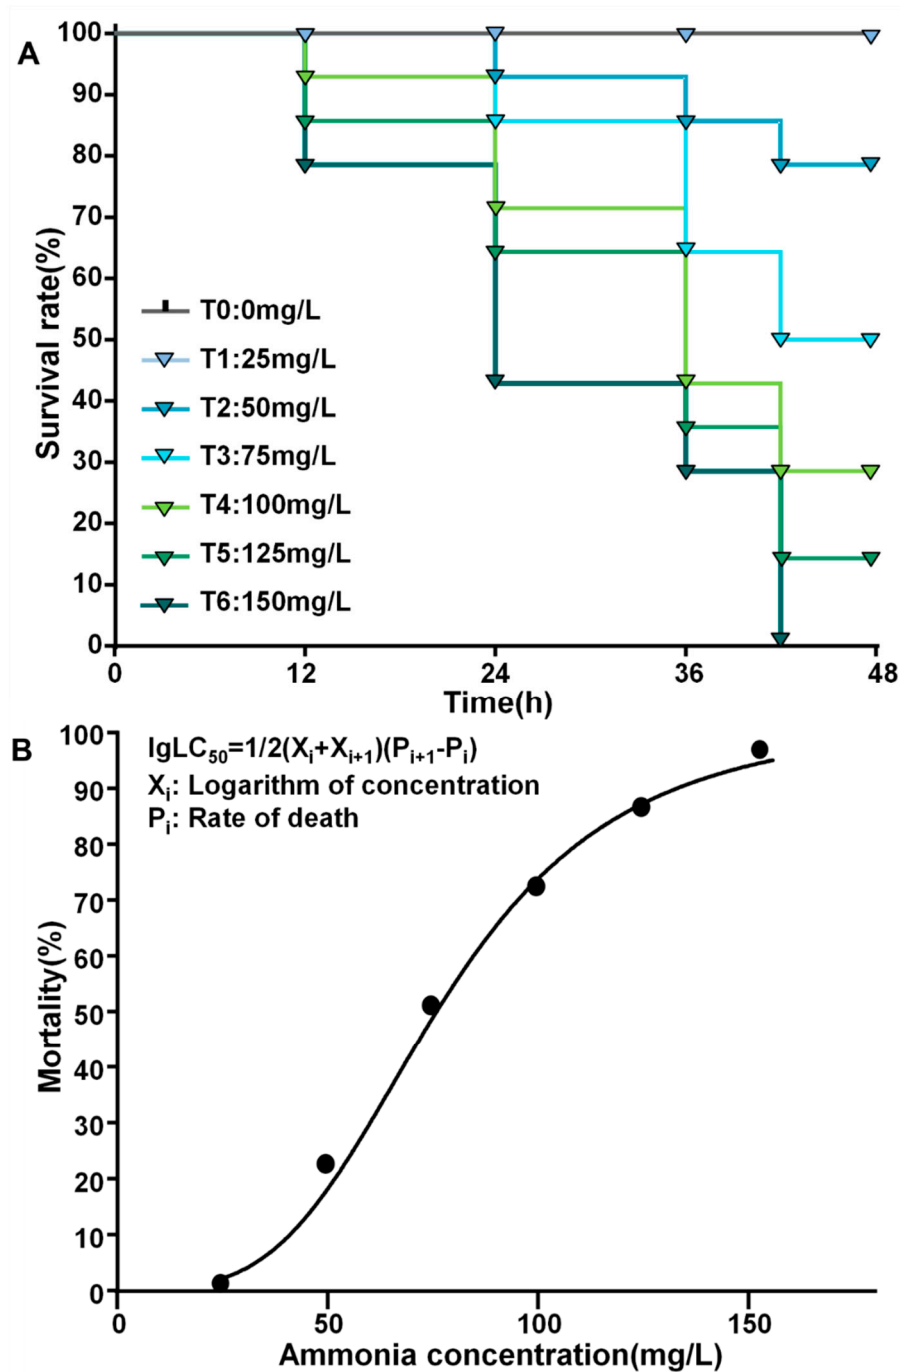

**Figure S1** The effects of acute ammonia exposure on the survival of *Litopenaeus vannamei*. (A) The 48 hours survival rate of shrimp *L. vannamei* after exposed to various ammonia (NH<sub>4</sub><sup>+</sup>) concentrations. (B) The dose-dependent mortality of *L. vannamei* after exposed to various ammonia (NH<sub>4</sub><sup>+</sup>) concentrations.

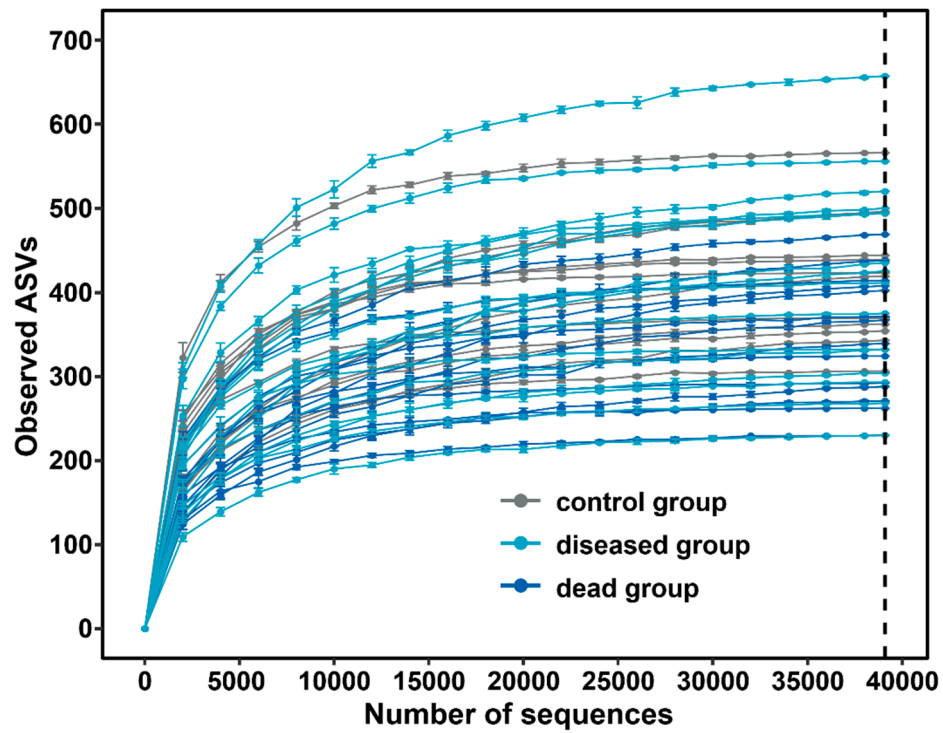

**Figure S2** Rarefaction curves of 16S rRNA sequencing depth and detected amplicon sequence variants (ASVs). The calculations were performed for 5 permutations after normalizing all the samples to nearly 40,000 reads.

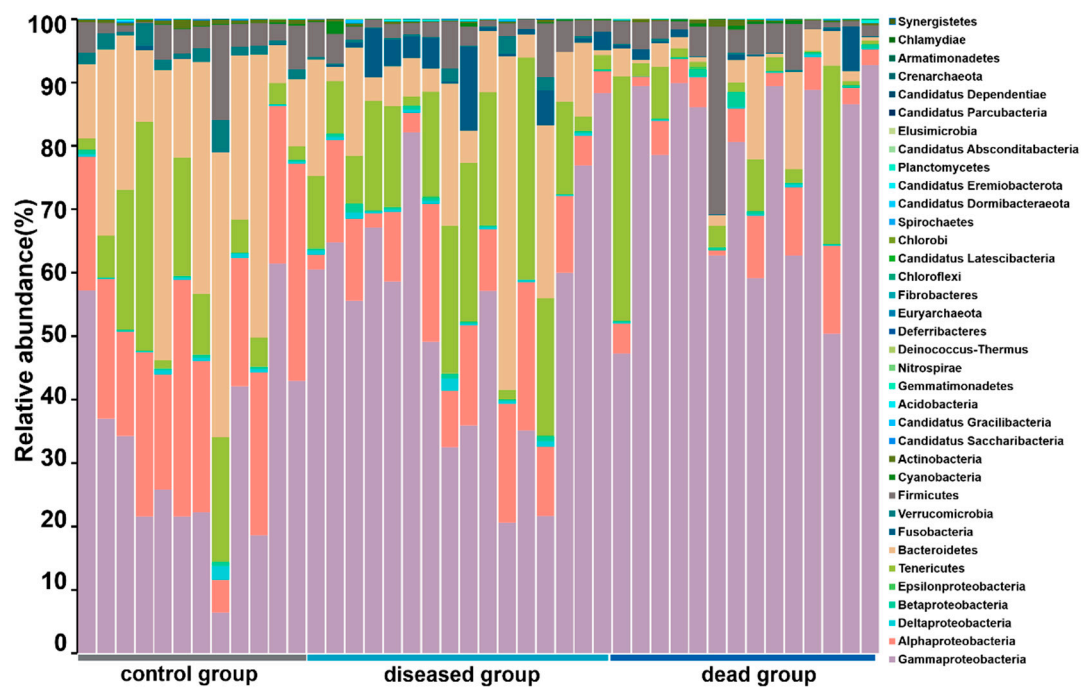

**Figure S3** Taxonomic structure of the gut microbiota at the phylum level. Proteobacteria were further classified to the class level.

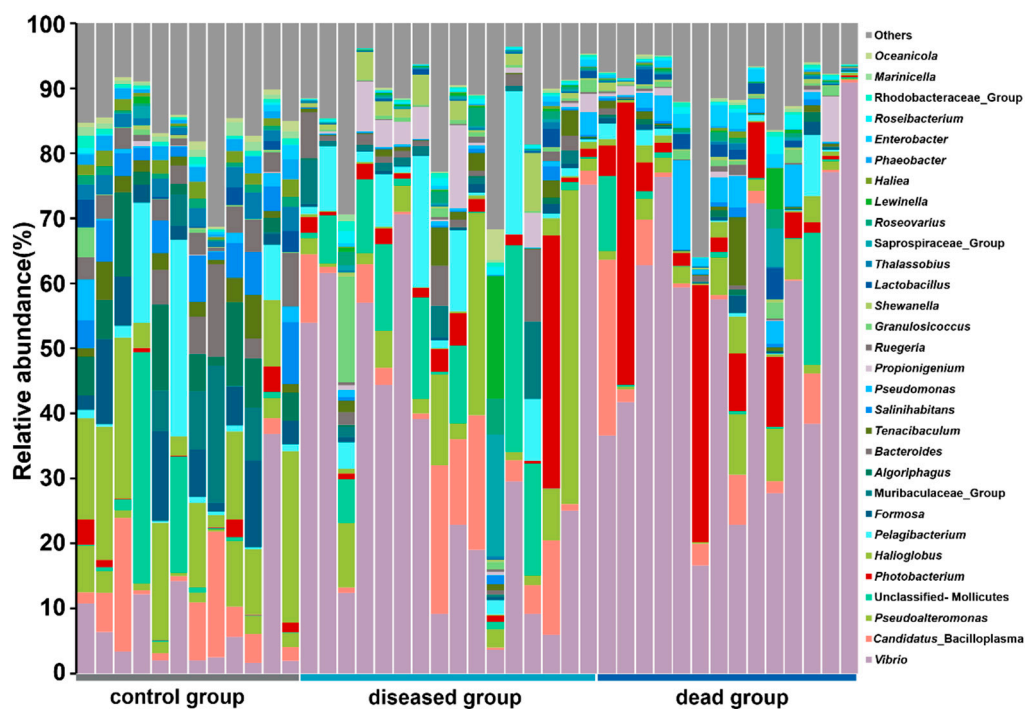

**Figure S4** Taxonomic structure of the gut microbiota at the genus level. The top 30 genera ranked by the relative abundance among the 42 samples are shown, while other genera are summarized as ‘Others’.

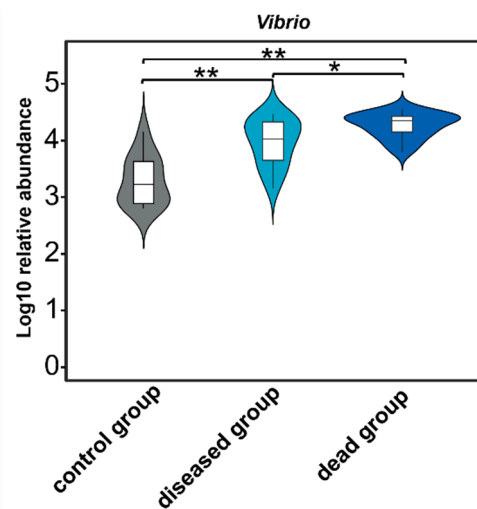

**Figure S5** The violin plots to show the relative abundances (log10) of *Vibrio* strains in three groups. Two-tailed student t-test was performed to assess the statistical variation of *Vibrio* between each pair of groups. \* $P < 0.05$ , \*\* $P < 0.01$ .

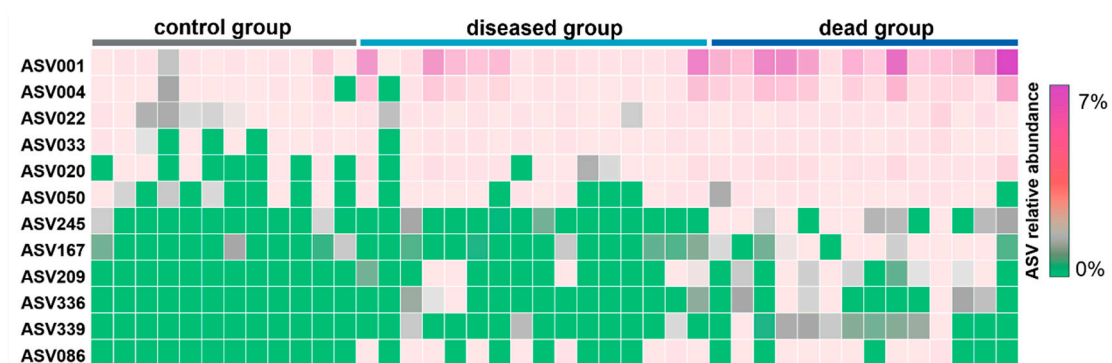

**Figure S6** The heatmap visualization of 12 significantly changed ASVs of *Vibrio* across different groups. One-way ANOVA was used to identify the significantly changed ASVs across different groups ( $P < 0.05$ ).

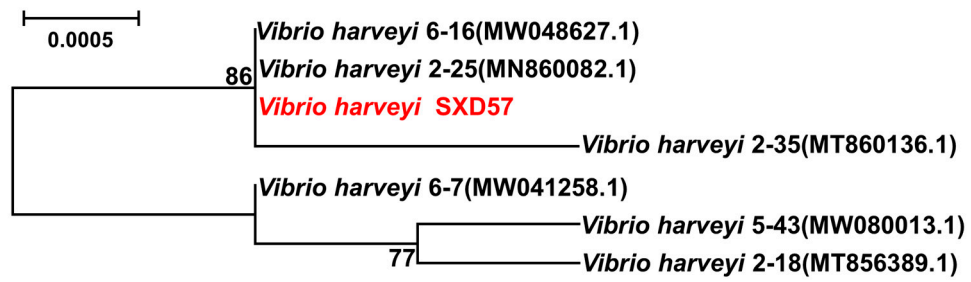

**Figure S7** Phylogenetic relationships between SXD57 and other related bacteria based on 16S rRNA gene sequences. The phylogenetic tree was generated using the maximum-likelihood method with 1000 bootstraps.



**Table S1 Information of 16S rRNA gene amplicon sequences.**

| Sample Name | Data size(bp) | Total number of clean reads | Average of read length(bp) | Maximum of read length (bp) | Minimum of read length (bp) |
|-------------|---------------|-----------------------------|----------------------------|-----------------------------|-----------------------------|
| control-1   | 19,027,986    | 51917                       | 423                        | 430                         | 103                         |
| control-2   | 30,306,054    | 82411                       | 421                        | 430                         | 50                          |
| control-3   | 32,136,671    | 85914                       | 423                        | 430                         | 54                          |
| control-4   | 30,502,890    | 82096                       | 424                        | 430                         | 53                          |
| control-5   | 27,475,456    | 79986                       | 421                        | 430                         | 14                          |
| control-6   | 30,979,534    | 82033                       | 423                        | 430                         | 64                          |
| control-7   | 17,694,619    | 50098                       | 420                        | 430                         | 50                          |
| control-8   | 25,438,341    | 77019                       | 421                        | 430                         | 88                          |
| control-9   | 31,440,998    | 87921                       | 422                        | 430                         | 227                         |
| control-10  | 26,326,459    | 79744                       | 419                        | 430                         | 262                         |
| control-11  | 32,199,134    | 84733                       | 423                        | 430                         | 205                         |
| control-12  | 20,699,770    | 58483                       | 419                        | 430                         | 54                          |
| diseased-1  | 26,204,315    | 69489                       | 426                        | 430                         | 54                          |
| diseased-2  | 33,228,679    | 81606                       | 425                        | 430                         | 15                          |
| diseased-3  | 34,301,794    | 90808                       | 424                        | 430                         | 58                          |
| diseased-4  | 32,388,503    | 82223                       | 426                        | 430                         | 261                         |
| diseased-5  | 31,062,221    | 77632                       | 426                        | 430                         | 52                          |
| diseased-6  | 31,871,054    | 79289                       | 426                        | 430                         | 53                          |
| diseased-7  | 34,788,859    | 85700                       | 425                        | 430                         | 15                          |
| diseased-8  | 23,587,028    | 64713                       | 423                        | 430                         | 52                          |
| diseased-9  | 33,896,782    | 84445                       | 423                        | 430                         | 241                         |
| diseased-10 | 28,522,776    | 73097                       | 425                        | 430                         | 99                          |

|             |            |       |     |     |     |
|-------------|------------|-------|-----|-----|-----|
| diseased-11 | 27,363,796 | 84353 | 421 | 430 | 15  |
| diseased-12 | 29,261,974 | 72219 | 426 | 430 | 104 |
| diseased-13 | 29,991,024 | 84620 | 423 | 430 | 123 |
| diseased-14 | 33,405,696 | 86601 | 425 | 430 | 119 |
| diseased-15 | 19,681,009 | 50741 | 426 | 430 | 223 |
| diseased-16 | 34,154,159 | 84023 | 427 | 430 | 223 |
| dead-1      | 35,342,960 | 87011 | 426 | 430 | 111 |
| dead-2      | 22,097,724 | 55929 | 427 | 430 | 243 |
| dead-3      | 35,525,898 | 89943 | 427 | 430 | 228 |
| dead-4      | 31,902,053 | 79517 | 428 | 430 | 239 |
| dead-5      | 25,503,132 | 63996 | 426 | 430 | 53  |
| dead-6      | 34,672,111 | 87996 | 422 | 430 | 15  |
| dead-7      | 20,697,495 | 53747 | 427 | 430 | 292 |
| dead-8      | 32,447,512 | 86202 | 425 | 430 | 64  |
| dead-9      | 32,994,776 | 82524 | 428 | 430 | 224 |
| dead-10     | 20,949,579 | 57916 | 425 | 430 | 262 |
| dead-11     | 32,427,027 | 80717 | 427 | 430 | 110 |
| dead-12     | 35,539,170 | 89253 | 426 | 430 | 51  |
| dead-13     | 34,328,415 | 83585 | 426 | 430 | 52  |
| dead-14     | 31,912,806 | 76631 | 428 | 430 | 52  |

---
